# Supplementary material for: Characterization and Gene Mapping of an Open-Glume Oryza sativa L. Mutant
Source: MDPI journal article supplement (doi:10.3390/ijms241612702), 2023-08-11
Supplement: s1 [file s1]

**Table S1** List of primers used in this study

| Primer name       | Sequence (5'-3')           | Purpose                     |
|-------------------|----------------------------|-----------------------------|
| K3F               | CGCGTCTCAAGTCGATCTCA       | SNP analysis                |
| K3R               | CTGTGCCGACAACAAGAATGAA     |                             |
| JAG.1reF          | CTCATCATTGTGCAAACAGGAAC    | Analysis of two transcripts |
| JAG.1reR          | CTTCTTCTTAGTAACCCTGGATGCT  |                             |
| JAG.2reF          | CTCTCCTTCCAAAAGCCTCATT     |                             |
| JAG.2reR          | CTTCTTCTTAGTAACCCTGGATGCT  |                             |
| EF1 $\alpha$ -reF | TTTCACTCTTGGTGTGAAGCAGAT   | Expression analysis         |
| EF1 $\alpha$ -reR | GACTTCCTTCACGATTTTCATCGTAA |                             |
| AP2-1reF          | GCCCAACCTCATCCCCTATT       |                             |
| AP2-1reR          | CTGCTTCCATGCCCAGCT         |                             |
| AP2-3reF          | ACAGGGGCGTCACCTTCTACA      |                             |
| AP2-3reR          | GCACAAACTCCTCCTTGGTCC      |                             |
| AP2-5reF          | ATTACGAGGATGACCTGAAGCA     |                             |
| AP2-5reR          | CGAACAGCCCCAAGTAGACG       |                             |
| CFO1reF           | CTGAAGGATGTGGAATGTGG       |                             |
| CFO1reR           | AACACTGGCTCTAAGCAGCA       |                             |
| DLreF             | CCCATCTGCTTACAACCGCTT      |                             |
| DLreR             | GTTGGAGGTGGAAACCGTCG       |                             |
| MADS13reF         | ATGGGGAGGGGCAGGATTGAG      |                             |
| MADS13reR         | TGCGCCTTCTTGTACCTGTCA      |                             |
| MADS14reF         | CGGTTGCGAGACGAGGAA         |                             |
| MADS14reR         | GAAAGACGGTGCTGGACGAA       |                             |
| MADS15reF         | CGTCGTCGGCCAAACAG          |                             |
| MADS15reR         | TGACTTCAATTCATTCAAGGTTGCT  |                             |
| MADS16reF         | CGAGGCGTACGAGACTCTGC       |                             |
| MADS16reR         | ACCACGCGGAAGGCGAACAT       |                             |
| MADS18reF         | AGCCAAATACTGAGGACC         |                             |
| MADS18reR         | TTGCTGGAGTTCTTTTATTGT      |                             |
| MADS1reF          | CCCAGATCAGGGTGACCATT       |                             |
| MADS1reR          | GGGTGATGAGCAACCATGTC       |                             |

|           |                          |
|-----------|--------------------------|
| MADS22reF | TATCATCCTTGTGGCTGCAT     |
| MADS22reR | TGGGATAATTAAACGGCACA     |
| MADS2reF  | CCACCACTGGATTGAATGTCC    |
| MADS2reR  | CAGAATGGCAAGCACAGAGC     |
| MADS34qF  | CAACCAGAGCACTTCTTCCA     |
| MADS34qR  | CTGAAGCTGAAACGGTAGCT     |
| MADS3reF  | AACGCAAACAGTAGGACCATAGTG |
| MADS3reR  | CCCCTCTCATTCTCAACAACC    |
| MADS4reF  | AGCACAAGATGTTGGCTTTTAGGG |
| MADS4reR  | CATCTAGCAGCGCATGAGG      |
| MADS57reF | CCGTACAAGCTGGACGATAA     |
| MADS57reR | ACATGAGCATCCGACAACAT     |
| MADS58reF | GAGCAAAGTTGCTGAGAGTG     |
| MADS58reR | GAGGCTGATGCATGATGTTG     |
| MADS6reF  | GGAAGAGTTGAGCTGAAGCG     |
| MADS6reR  | AGAGAACGGACAGCTCGTAG     |
| MADS7reF  | TGGGTTCTTCCATCCACTTG     |
| MADS7reR  | CGTCATCATCATGGTAGCCA     |
| MADS8reF  | CACCTTGCAGATCGGGTTTA     |
| MADS8reR  | ATCTGTGTCGTCACATCCGT     |
| REP1reF   | GAAAGGAGACGCGGACAAG      |
| REP1reR   | CCGGTGTTGTTGCTCATCAT     |
